# Supplementary material for: Highlights of the 2021 American Joint Replacement Registry Annual Report
Source: PubMed Central journal article supplement (PMC8810304; doi:10.1016/j.artd.2022.01.020), 2022-01-29
Supplement: mmc1.pdf [file mmc1.pdf]

# CONFLICT OF INTEREST STATEMENT

## *American Association of Hip and Knee Surgeons*

(Adopted from the American Academy of Orthopaedic Surgeons disclosure statement)

The following form **must be filled out completely and submitted by each author (example, 6 authors, 6 forms).**  
**All items require a response. If there is no relevant disclosure for a given item, enter "None."**

---

Manuscript Title    **AJRR Update 2021**

1.        Royalties from a company or supplier (The following conflicts were disclosed)

None

2.        Speakers bureau/paid presentations for a company or supplier (The following conflicts were disclosed)

None

3A.      Paid employee for a company or supplier (The following conflicts were disclosed)

None

3B.      Paid consultant for a company or supplier (The following conflicts were disclosed)

Zimmer Biomet, Intellijoint

3C.      Unpaid consultants for a company or supplier (The following conflicts were disclosed)

AZ Solutions, LLC

4.        Stock or stock options in a company or supplier (The following conflicts were disclosed)

ROMTech

5.        Research support from a company or supplier as a Principal Investigator (The following conflicts were disclosed)

none

6.        Other financial or material support from a company or supplier (The following conflicts were disclosed)

none

7.        Royalties, financial or material support from publishers (The following conflicts were disclosed)

none

8.        Medical/Orthopaedic publications editorial/governing board (The following conflicts were disclosed)

none

9.        Board member/committee appointments for a society (The following conflicts were disclosed)

none

**Each author must sign AND print or type his/her name, date and submit a separate form**

In addition, one BLINDED Conflict of Interest form (no author names used) should be submitted per manuscript with all author disclosures.

Ahmed Siddiqi



1/12/2022

---

Author Name (Print or Type)

Author Signature

Date
