# Supplementary material for: Highlights of the 2021 American Joint Replacement Registry Annual Report
Source: PubMed Central journal article supplement (PMC8810304; doi:10.1016/j.artd.2022.01.020), 2022-01-29
Supplement: mmc2.pdf [file mmc2.pdf]

# INDIVIDUAL CONFLICT OF INTEREST STATEMENT

## *American Association of Hip and Knee Surgeons*

(Adopted from the American Academy of Orthopaedic Surgeons disclosure statement)

The following form **must be filled out completely and submitted by each author (example, 6 authors, 6 forms).** **All items require a response. If there is no relevant disclosure for a given item, enter "None."**

---

**Manuscript Title: AJRR Update**

1. Royalties from a company or supplier (The following conflicts were disclosed)

None

2. Speakers bureau/paid presentations for a company or supplier (The following conflicts were disclosed)

None

3A. Paid employee for a company or supplier (The following conflicts were disclosed)

None

3B. Paid consultant for a company or supplier (The following conflicts were disclosed)

Link, Exactech

3C. Unpaid consultants for a company or supplier (The following conflicts were disclosed)

None

4. Stock or stock options in a company or supplier (The following conflicts were disclosed)

None

5. Research support from a company or supplier as a Principal Investigator (The following conflicts were disclosed)

Institutional support from Zimmer-Biomet

6. Other financial or material support from a company or supplier (The following conflicts were disclosed)

None

7. Royalties, financial or material support from publishers (The following conflicts were disclosed)

Human Kinetics. Kluwers- Wolters and Slack Inc.

8. Medical/Orthopaedic publications editorial/governing board (The following conflicts were disclosed)

JOA, AT (Deputy editor), Orthopedics

9. Board member/committee appointments for a society (The following conflicts were disclosed)

AAHKS—Patient education and research committees; AAOS—ALI 3; MAOA—Education committee

**Each author must sign AND print or type his/her name, date and submit a separate form**

In addition, one BLINDED Conflict of Interest form (no author names used) should be submitted per manuscript with all author disclosures.

Brett Levine



1/12/2022

---

Author Name (Print or Type)

Author Signature

Date
